# Supplementary material
Source: MDPI journal article supplement (https://www.mdpi.com/1424-8247/14/5/476)
Supplement: s1 [file s1]

## SUPPLEMENTARY MATERIALS

**Table S1.** Risk of bias for non randomized studies.

|                              | Confounding bias | Selection bias | Classification intervention bias | Deviation from intended intervention | Missing data bias | Measure outcome bias | Selected outcome bias | Overall bias |
|------------------------------|------------------|----------------|----------------------------------|--------------------------------------|-------------------|----------------------|-----------------------|--------------|
| Mehnert<br>[NCT02054806]     | +                | +              | +                                | +                                    | +/-               | +                    | +                     | +            |
| Mehnert<br>[NCT02054806]     | +                | +              | +                                | +                                    | +/-               | +/-                  | +/-                   | +            |
| Strosberg<br>[NCT02628067]   | +                | +              | +                                | +                                    | +/-               | +                    | +                     | +            |
| Yao<br>[NCT02955069]         | +                | +              | +                                | +                                    | +/-               | +                    | +                     | +/-          |
| Yao<br>[NCT02955069]         | +                | +              | +                                | +                                    | +/-               | +                    | +                     | +/-          |
| Patel<br>[NCT02834013]       | +                | +              | +                                | +                                    | +/-               | +                    | +/-                   | +            |
| Lu<br>[NCT03167853]          | +/-              | +              | +                                | +                                    | +                 | +                    | +                     | +            |
| Vijayvergia<br>[NCT02939651] | +/-              | +              | +                                | +                                    | +                 | +                    | +/-                   | +            |
| Halperin<br>[NCT03074513]    | +/-              | +              | +                                | +                                    | -                 | -                    | +/-                   | +            |
| Halperin<br>[NCT03074513]    | +/-              | +              | +                                | +                                    | -                 | -                    | +/-                   | +            |
| Zhang<br>[NCT03167853]       | +/-              | +              | +                                | +                                    | +/-               | +                    | +/-                   | +            |
| Fottner<br>[NCT03352934]     | +/-              | +              | +                                | +                                    | +                 | +                    | +/-                   | +            |



|                                          |   |   |   |   |   |   |     |   |
|------------------------------------------|---|---|---|---|---|---|-----|---|
| Mulvey<br>[NCT03136055]                  | + | + | + | + | + | + | +/- | + |
| Frumovitz<br>[NCT02721732]               | + | + | + | + | + | + | +   | + |
| Rodriguez-<br>Freixinos<br>[NCT03278405] | + | + | + | + | + | + | +   | + |
| Klein<br>[NCT02923934]                   | + | + | + | + | + | + | +   | + |
| Capdevila<br>[NCT03095274]               | + | + | + | + | + | + | +/- | + |



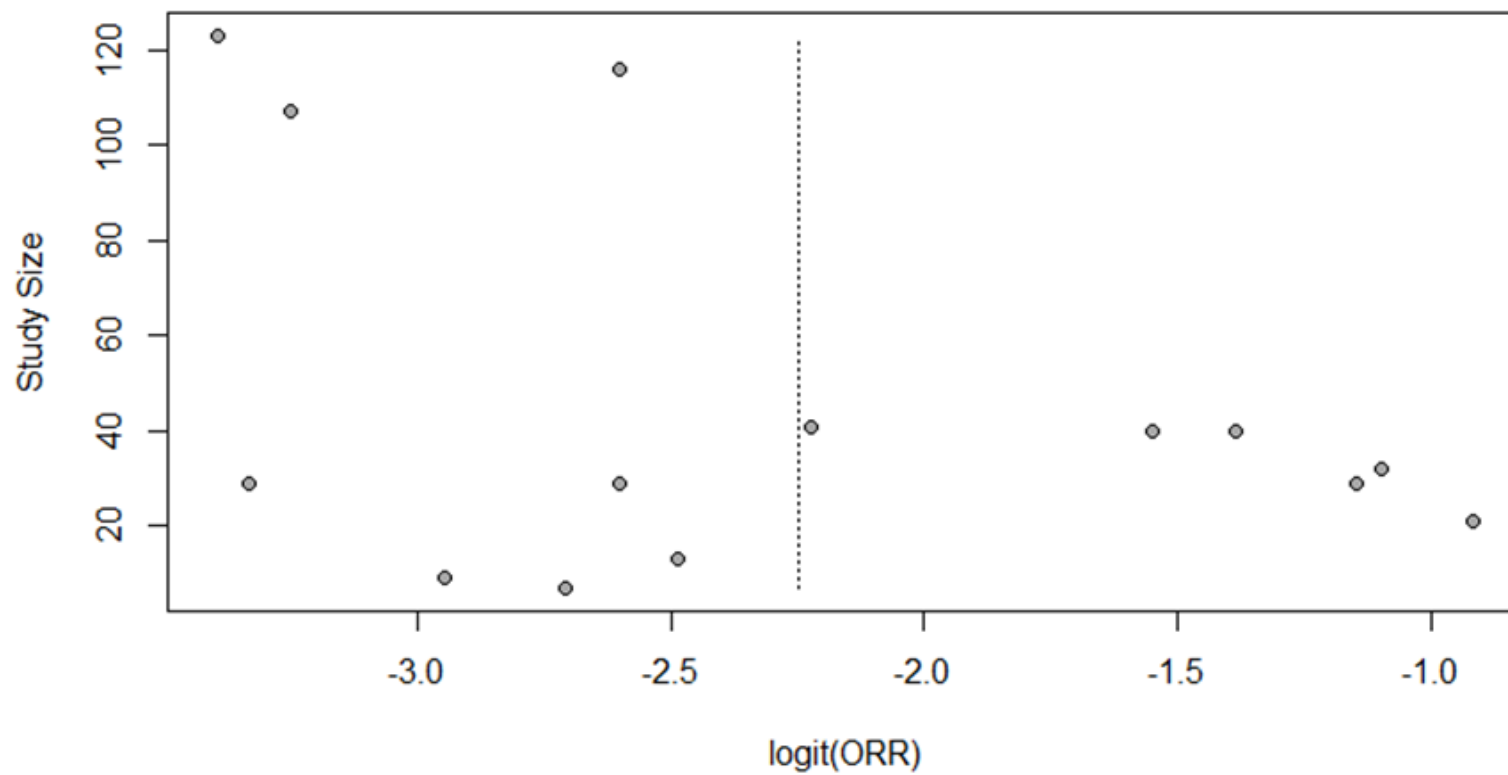

**Figure S1:** Funnel plot of overall response rate (ORR) for publication bias.
